# Supplementary material for: Defect evolution behaviors from single sulfur point vacancies to line vacancies in monolayer molybdenum disulfide
Source: Royal Society of Chemistry journal article supplement (doi:10.1039/d1cp02852a), 2021-01-01
Supplement: d1cp02852a1.pdf [file d1cp02852a1.pdf]

## Electronic Supplementary Information for

### Defect evolution behaviors from single sulfur point vacancies to line vacancies in the monolayer molybdenum disulfide

Chan Gao<sup>1,2</sup>, Xiaoyong Yang<sup>3</sup>, Ming Jiang<sup>1</sup>, Lixin Chen<sup>1</sup>, Zhiwen Chen<sup>1</sup>, Chandra Veer Singh<sup>1,4,\*</sup>

<sup>1</sup>*Department of Materials Science and Engineering, University of Toronto, Toronto, ON M5S 3E4, Canada*

<sup>2</sup>*Institute of Nuclear Physics and Chemistry, China Academy of Engineering Physics, Mianyang 621900, China*

<sup>3</sup>*Condensed Matter Theory Group, Materials Theory Division, Department of Physics and Astronomy, Uppsala University, Uppsala 75120, Sweden*

<sup>4</sup>*Department of Mechanical and Industrial Engineering, University of Toronto, Toronto, ON M5S 3G8, Canada*

\* Correspondence and request for materials should be addressed to C.V. Singh (chandraveer.singh@utoronto.ca).

## S1 Basic properties of monolayer MoS<sub>2</sub>

The zero-temperature equilibrium lattice constant and cohesive energy of unit cell were calculated by minimizing the energy of monolayer MoS<sub>2</sub> using conjugate gradients with force and energy tolerances of 10<sup>-10</sup> eV/Å and 10<sup>-10</sup> eV, respectively[1].

The structural stability of monolayer MoS<sub>2</sub> with vacancy defects can be studied by the formation energy, i.e., the amount of energy required to remove atoms. The formation energy per vacancy  $E_{form}$  in the defective monolayer MoS<sub>2</sub> can be obtained using the following equation[2]:

$$E_{form} = \frac{E_{defect} - E_{pristine} + N_i \mu_i}{N_i} \quad (1)$$

where  $E_{defect}$ ,  $E_{pristine}$  are the total energy of the defective monolayer and pristine monolayer MoS<sub>2</sub>, respectively, and  $\mu_i$  is the chemical potential of Mo or S, depending on the type of defect in monolayer MoS<sub>2</sub> with  $N_i$  vacancies. The chemical potentials of Mo and S atoms are obtained from body centered cubic (BCC) bulk molybdenum and the stable S<sub>8</sub> ring, respectively. The computed chemical potentials of Mo and S atoms using DFT were -10.93 and -4.13 eV, respectively, which agree well with the corresponding previous results of -11.09 and -4.03 eV[3]. The formation energy of vacancies depends highly on the concentration of vacancies in the materials. The sizes of the system that generates the vacancies in Figure S1 are 5 × 5 supercell and 2.55 nm × 2.76 nm ( $8a_0 \times 5\sqrt{3}a_0$ ,  $a_0$  is the lattice parameter) for the first principles and molecular dynamics calculations, respectively.

## S2 Mechanical properties of monolayer MoS<sub>2</sub>

Due to D<sub>3h</sub> symmetry, there are only two independent elastic constants  $C_{11}$  and  $C_{12}$ , and  $C_{11}$  and  $C_{22}$  are the same, which means that the orientation (the armchair and zigzag direction) does not affect the elastic behavior of monolayer MoS<sub>2</sub> under small strain. The zero-temperature linear elastic constants  $C_{11}$  and  $C_{12}$  are calculated using molecular

statics simulation by finite difference[1, 4],

$$C_{11} = \frac{\Delta\sigma_1}{\Delta\varepsilon_1} \quad (2)$$

$$C_{12} = \frac{1}{2} \left( \frac{\Delta\sigma_1}{\Delta\varepsilon_2} + \frac{\Delta\sigma_2}{\Delta\varepsilon_1} \right) \quad (3)$$

$$C_{66} = \frac{1}{2} (C_{11} - C_{12}) \quad (4)$$

where  $\Delta\sigma$  and  $\Delta\varepsilon$  are the stress and strain induced by infinitesimally changing simulation box from their equilibrium state, respectively.

Theoretically, the isotropic linear elastic properties, the in-plane Young's modulus  $E$  and Poisson's ratio  $\nu$  can be calculated as[4]:

$$E = (C_{11}^2 - C_{12}^2)/C_{11} \quad (5)$$

$$\nu = C_{12}/C_{11} \quad (6)$$

The elastic constants of monolayer MoS<sub>2</sub> with defects depend on the defect concentration. The size of monolayer MoS<sub>2</sub> was taken as  $5a_0 \times 3\sqrt{3}a_0$  with a line vacancies defect along x zigzag direction and single point vacancy defects, where  $a_0$  is the lattice parameter. It should be noted that  $C_{11}$  is not equal to  $C_{22}$  in the monolayer MoS<sub>2</sub> with defects.

### **S3 Ultimate strain and strength of monolayer MoS<sub>2</sub> with defects**

In order to study the effects of the sulfur point vacancies and line vacancies defects on the ultimate strain and strength of monolayer MoS<sub>2</sub>, the same calculation method as in the main text was used. The size of monolayer MoS<sub>2</sub> was taken as  $3.1 \text{ nm} \times 3.2 \text{ nm}$  ( $10a_0 \times 6\sqrt{3}a_0$ ,  $a_0$  is the lattice parameter) with a line vacancies defect along x zigzag direction and single point vacancy defects with the same number of sulfur vacancies,

as shown in Figure S4.

**Table S1.** Lattice parameter ( $a_0$ ), Mo-S bond distance ( $d_{\text{Mo-S}}$ ), the distance between the two nearest S atoms above and below the Mo layer ( $d_{\text{S-S}}$ ), the cohesive energy per unit cell ( $E_c$ ), the formation energy of S vacancy ( $E_S$ ) and Mo vacancy ( $E_{\text{Mo}}$ ) of monolayer MoS<sub>2</sub> calculated by DFT and MD with different interatomic potentials.

| Potential | $a_0$   | $d_{\text{Mo-S}}$ | $d_{\text{S-S}}$ | $E_c$ (eV) | $E_S$ (eV) | $E_{\text{Mo}}$ (eV) |
|-----------|---------|-------------------|------------------|------------|------------|----------------------|
| DFT       | 3.18424 | 2.41248           | 3.12427          | -21.84638  | 2.6476     | 7.16797              |
| SW13      | 3.06430 | 2.39820           | 3.23814          | -12.77177  | 3.84034    | 6.21984              |
| SW13_f    | 3.09368 | 2.39204           | 3.18217          | -12.75808  | 3.83076    | 6.22058              |
| SW15      | 3.11754 | 2.38115           | 3.11781          | -3.716560  | --         | --                   |
| REBO      | 3.16752 | 2.44393           | 3.24248          | -21.48697  | 3.59333    | 6.08057              |
| SW16      | 3.19757 | 2.46094           | 3.25458          | -8.80474   | 1.80083    | 6.79146              |
| ReaxFF    | 3.18605 | 2.43248           | 3.18328          | -15.13643  | 2.68602    | 8.08712              |

**Table S2.** Energy differences between monolayer MoS<sub>2</sub> with a line defect and single point vacancy defects with 2 ( $\Delta E_2$ ) and 3 ( $\Delta E_3$ ) sulfur vacancies calculated by DFT and MD with different interatomic potentials, where  $\Delta E = \Delta E_{\text{point}} - \Delta E_{\text{line}}$ .

| Potential | $\Delta E_2$ | $\Delta E_3$ |
|-----------|--------------|--------------|
| DFT       | 0.06452      | 0.08822      |
| SW13      | 0.15200      | 0.31634      |
| SW13_f    | 0.13720      | 0.27932      |
| SW15      | 0.0          | 0.0          |
| REBO      | 0.12024      | 0.28015      |
| SW16      | 0.24286      | 0.54568      |
| ReaxFF    | 0.11532      | 0.24667      |

**Table S3.** The elastic constants  $C_{11}$ ,  $C_{12}$  and  $C_{66}$ , Young's modulus  $E$  and Poisson's ratio  $\nu$  of monolayer MoS<sub>2</sub> calculated by DFT and MD with different interatomic potentials.

| Potential | $C_{11}$ (N/m) | $C_{12}$ (N/m) | $C_{66}$ (N/m) | $E$ (N/m) | $\nu$ |
|-----------|----------------|----------------|----------------|-----------|-------|
| DFT       | 133.761        | 32.953         | 50.404         | 125.643   | 0.246 |
| SW13      | 81.775         | 30.168         | 25.80352       | 70.646    | 0.369 |
| SW13_f    | 140.774        | 52.735         | 44.018         | 121.019   | 0.375 |
| SW15      | 105.331        | 28.299         | 38.514         | 97.728    | 0.269 |
| REBO      | 154.361        | 45.760         | 54.299         | 140.796   | 0.296 |
| SW16      | 133.025        | 39.386         | 46.821         | 121.364   | 0.296 |
| ReaxFF    | 230.119        | 115.693        | 57.135         | 171.954   | 0.503 |

**Table S4.** The elastic constants  $C_{11}$  of monolayer MoS<sub>2</sub> with a line defect and single point vacancies defects with 1, 2 and 3 sulfur vacancies calculated by DFT and MD with different interatomic potentials.

| Potential | Point_1 | Point_2 | Point_3 | Line_2   | Line_3     |
|-----------|---------|---------|---------|----------|------------|
| DFT       | 128.657 | 124.367 | 120.877 | 126.079  | 124.054    |
| SW13      | 80.846  | 79.918  | 79.064  | 80.239   | 79.632     |
| SW13_f    | 137.734 | 134.770 | 132.249 | 135.680  | 133.746    |
| SW15      | 101.237 | 97.358  | 94.304  | 98.837   | 96.719     |
| REBO      | 150.087 | 145.980 | 142.894 | 147.744  | 163.409    |
| SW16      | 129.118 | 125.469 | 122.382 | 126.672  | 124.406    |
| ReaxFF    | 255.420 | 268.222 | 248.998 | 4191.688 | -19290.578 |

**Table S5.** The elastic constants  $C_{12}$  of monolayer MoS<sub>2</sub> with a line defect and single point vacancies defects with 1, 2 and 3 sulfur vacancies calculated by DFT and MD with different interatomic potentials.

| Potential | Point_1 | Point_2 | Point_3 | Line_2   | Line_3   |
|-----------|---------|---------|---------|----------|----------|
| DFT       | 33.539  | 33.056  | 32.274  | 32.169   | 30.772   |
| SW13      | 29.766  | 29.367  | 28.968  | 29.332   | 28.885   |
| SW13_f    | 51.358  | 50.056  | 48.832  | 49.842   | 48.366   |
| SW15      | 26.886  | 25.633  | 24.433  | 25.133   | 23.390   |
| REBO      | 44.680  | 43.819  | 42.748  | 42.887   | 1.667    |
| SW16      | 38.184  | 37.049  | 36.081  | 36.957   | 35.781   |
| ReaxFF    | 98.136  | 125.731 | 75.249  | 1414.225 | 4707.022 |

**Table S6.** The elastic constants  $C_{22}$  of monolayer MoS<sub>2</sub> with a line defect and single point vacancies defects with 1, 2 and 3 sulfur vacancies calculated by DFT and MD with different interatomic potentials.

| Potential | Point_1 | Point_2 | Point_3 | Line_2    | Line_3   |
|-----------|---------|---------|---------|-----------|----------|
| DFT       | 128.496 | 124.479 | 119.497 | 122.130   | 114.611  |
| SW13      | 80.842  | 79.912  | 79.033  | 79.945    | 79.032   |
| SW13_f    | 137.724 | 134.721 | 131.937 | 134.301   | 130.864  |
| SW15      | 101.207 | 97.214  | 93.499  | 95.703    | 89.739   |
| REBO      | 150.021 | 145.862 | 141.738 | 142.913   | 107.420  |
| SW16      | 129.155 | 125.296 | 122.017 | 125.188   | 121.380  |
| ReaxFF    | 222.711 | 264.662 | 208.454 | -5970.110 | -567.385 |

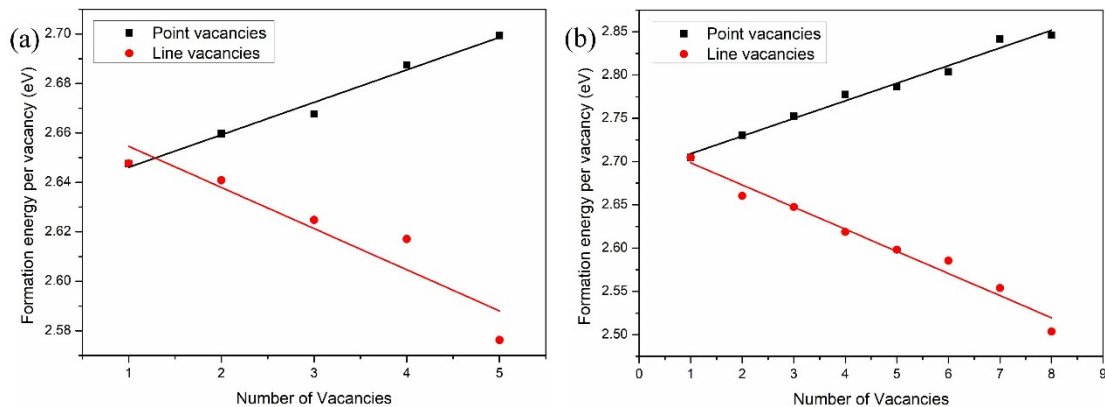

**Figure S1.** The formation energy per sulfur vacancy of monolayer MoS<sub>2</sub> with single sulfur point vacancies and line vacancies defects with different numbers of vacancies obtained from (a) First principles, (b) Molecular dynamics.

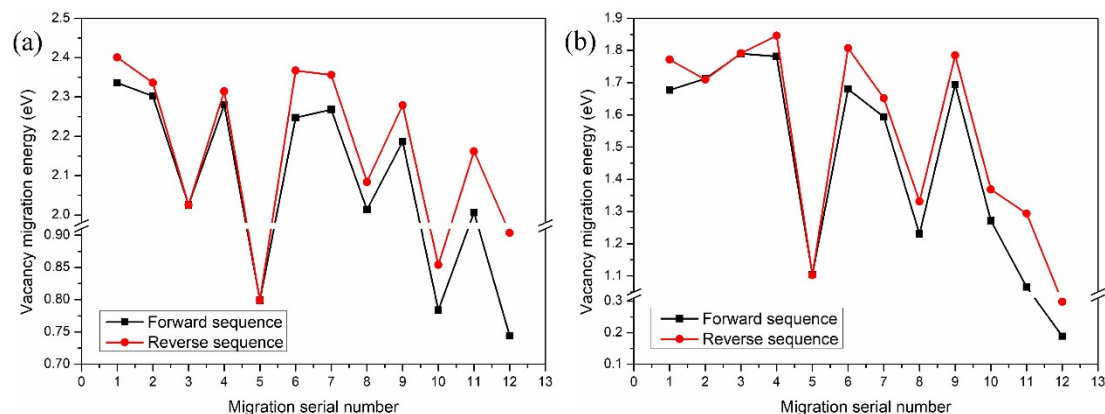

**Figure S2.** Sulfur vacancy migration energy in monolayer MoS<sub>2</sub> obtained from (a) First principles, (b) Molecular dynamics.

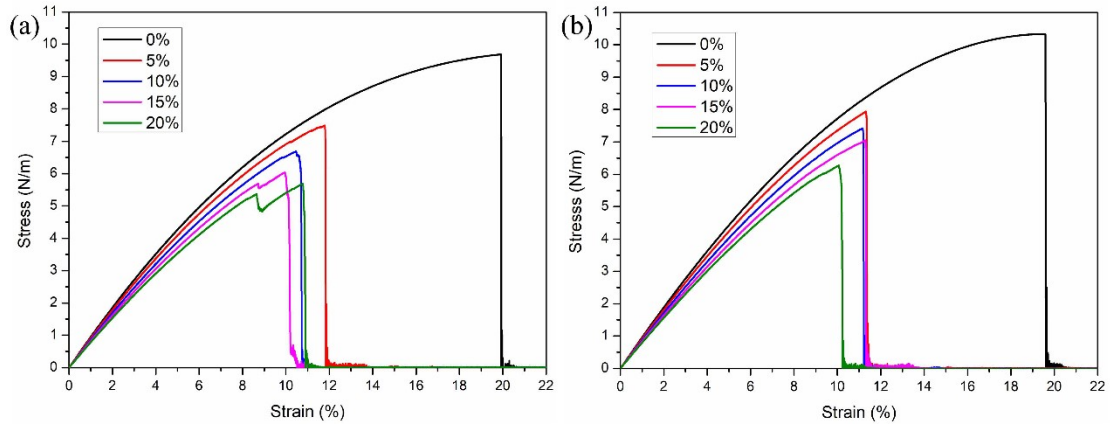

**Figure S3.** The stress–strain curves of monolayer MoS<sub>2</sub> with different single sulfur vacancy concentrations before the defect evolution in (a) zigzag direction and (b) armchair direction.

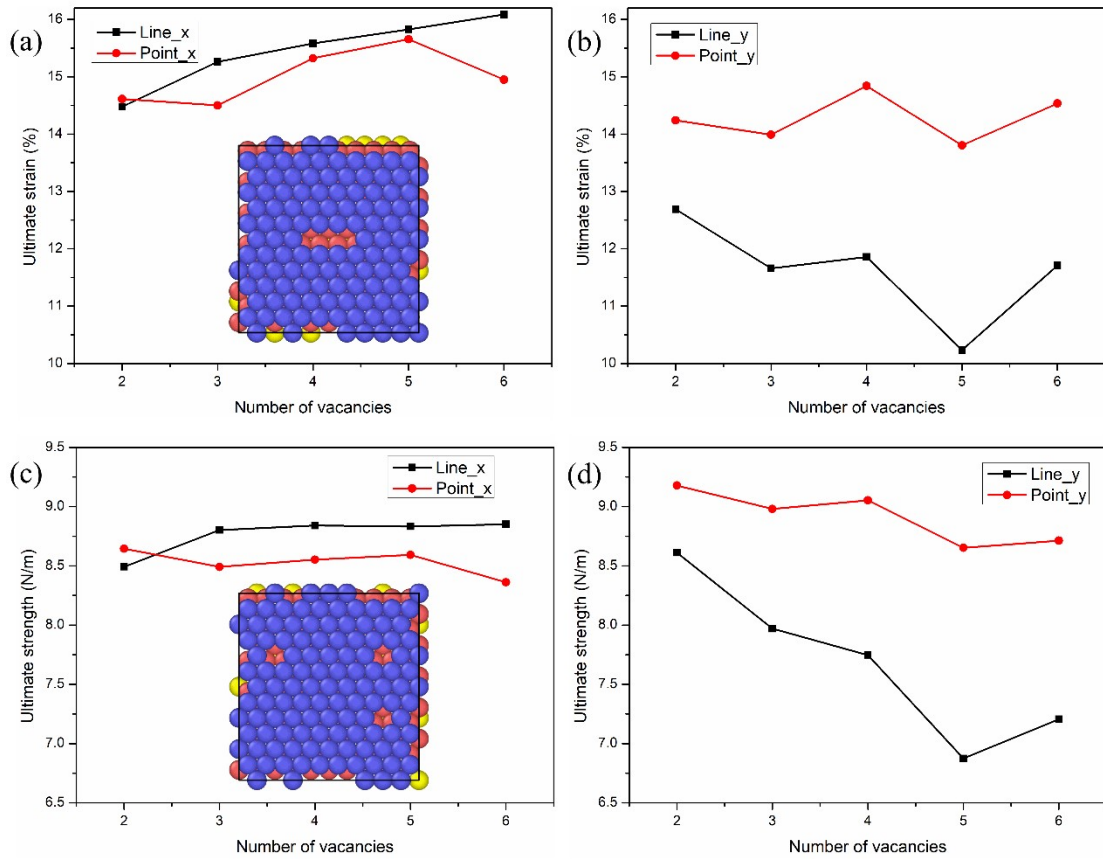

**Figure S4.** The (a, b) ultimate strain and (c, d) ultimate strength of monolayer MoS<sub>2</sub> with a line vacancies defect along x zigzag direction and single point vacancy defects with the same number of sulfur vacancies under uniaxial tensile loading along the (a, c) x zigzag and (b, d) y armchair direction.



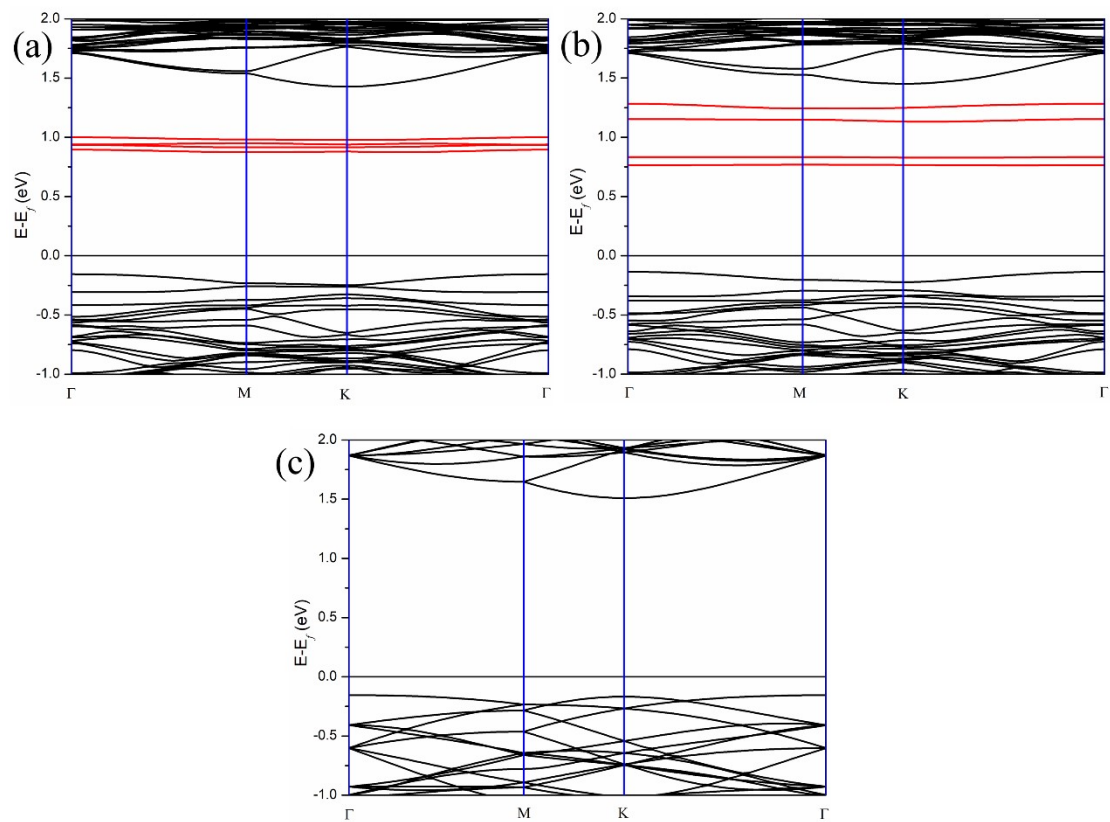

**Figure S5.** Calculated electronic band structures of monolayer MoS<sub>2</sub> with (a) two single sulfur vacancies, (b) di-vacancy line defect, and (c) pristine monolayer MoS<sub>2</sub>. The defective states are denoted by red lines. The Fermi level is set to zero.

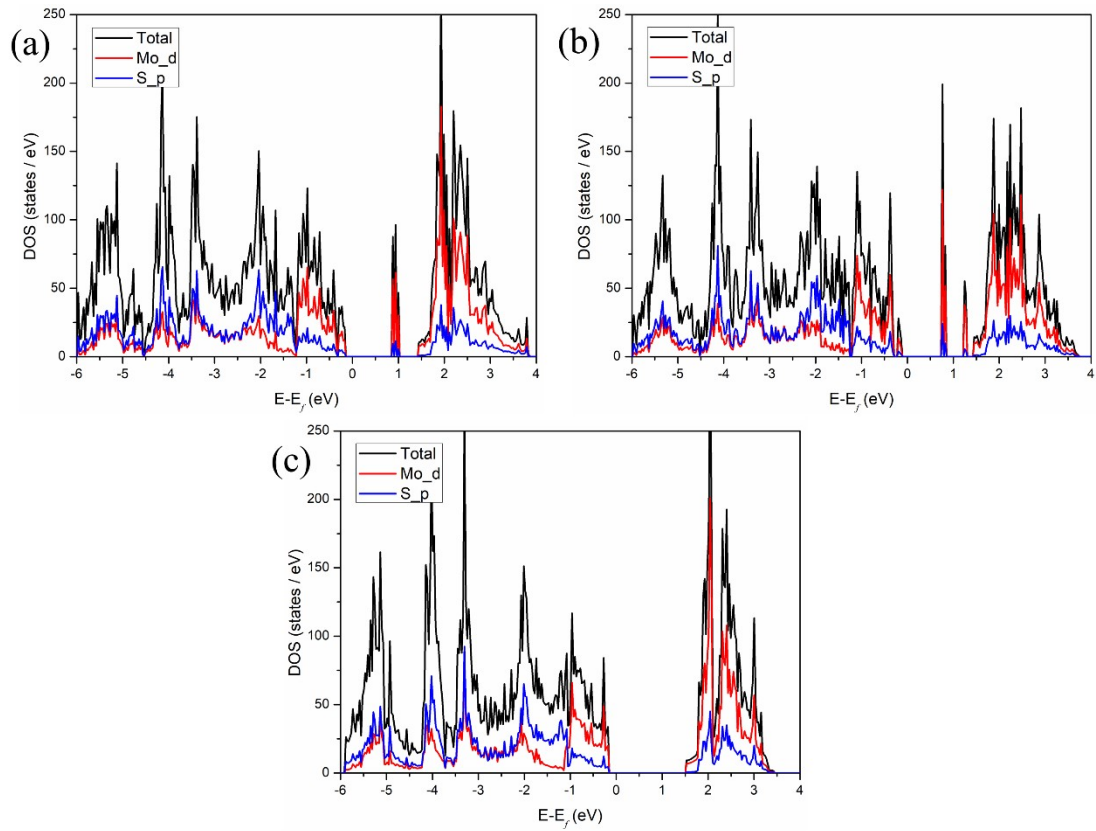

**Figure S6.** Total density of states (DOS) and partial DOS of monolayer MoS<sub>2</sub> with (a) two single sulfur vacancies, (b) di-vacancy line defect, and (c) pristine monolayer MoS<sub>2</sub>. The Fermi level is set to zero.

## References:

- [1] M. Wen, S.N. Shirodkar, P. Plecháč, E. Kaxiras, R.S. Elliott, E.B. Tadmor, A force-matching Stillinger-Weber potential for MoS<sub>2</sub>: Parameterization and Fisher information theory based sensitivity analysis, *Journal of Applied Physics*, 122 (2017) 244301.
- [2] Y. Han, T. Hu, R. Li, J. Zhou, J. Dong, Stabilities and electronic properties of monolayer MoS<sub>2</sub> with one or two sulfur line vacancy defects, *Physical Chemistry Chemical Physics*, 17 (2015) 3813-3819.
- [3] S. Kc, R.C. Longo, R. Addou, R.M. Wallace, K. Cho, Impact of intrinsic atomic defects on the electronic structure of MoS<sub>2</sub> monolayers, *Nanotechnology*, 25 (2014) 375703.
- [4] S. Thomas, K.M. Ajith, M.C. Valsakumar, Directional anisotropy, finite size effect and elastic properties of hexagonal boron nitride, *Journal of Physics: Condensed Matter*, 28 (2016) 295302.
